# Supplementary material for: Transgelin, a p53 and PTEN-Upregulated Gene, Inhibits the Cell Proliferation and Invasion of Human Bladder Carcinoma Cells In Vitro and In Vivo
Source: PubMed Central journal article supplement (PMC6801752; doi:10.3390/ijms20194946), 2019-10-07
Supplement: ijms-20-04946-s001.pdf [file ijms-20-04946-s001.pdf]

## Supplementary Figures

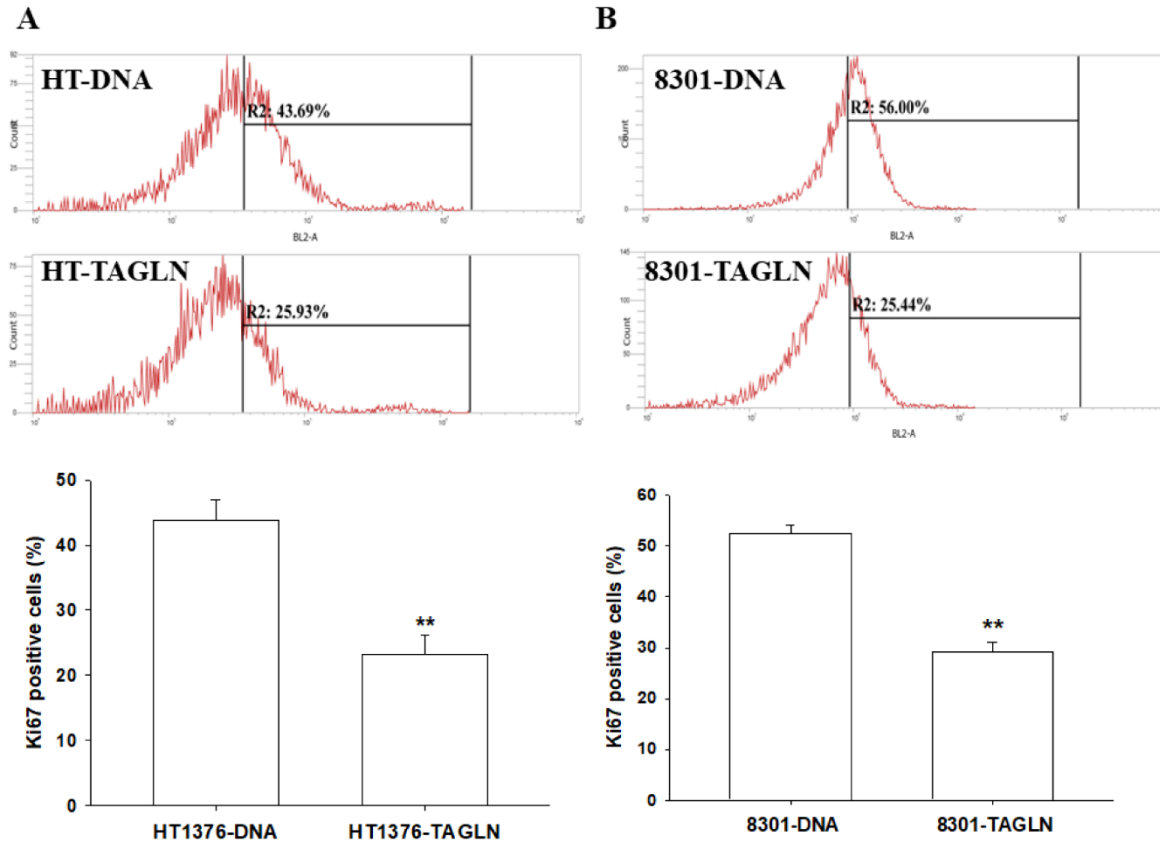

**Figure S1.** Effect of TAGLN on cell proliferation of bladder carcinoma HT1376 and TSGH-8301 cells determined by Ki-67 assays. Proliferation rates between (A) mock-transfected HT1376 (HT-DNA) and ectopic TAGLN overexpressed HT1376 (HT-TAGLN), and (B) between mock-transfected TSGH-8301 (8301-DNA) and ectopic TAGLN overexpressed TSGH-8301 (8301-TAGLN) cells were determined by Ki-67 assays ( $\pm$  SE;  $n = 3$ ). \*\* is represented the  $p < 0.01$ .

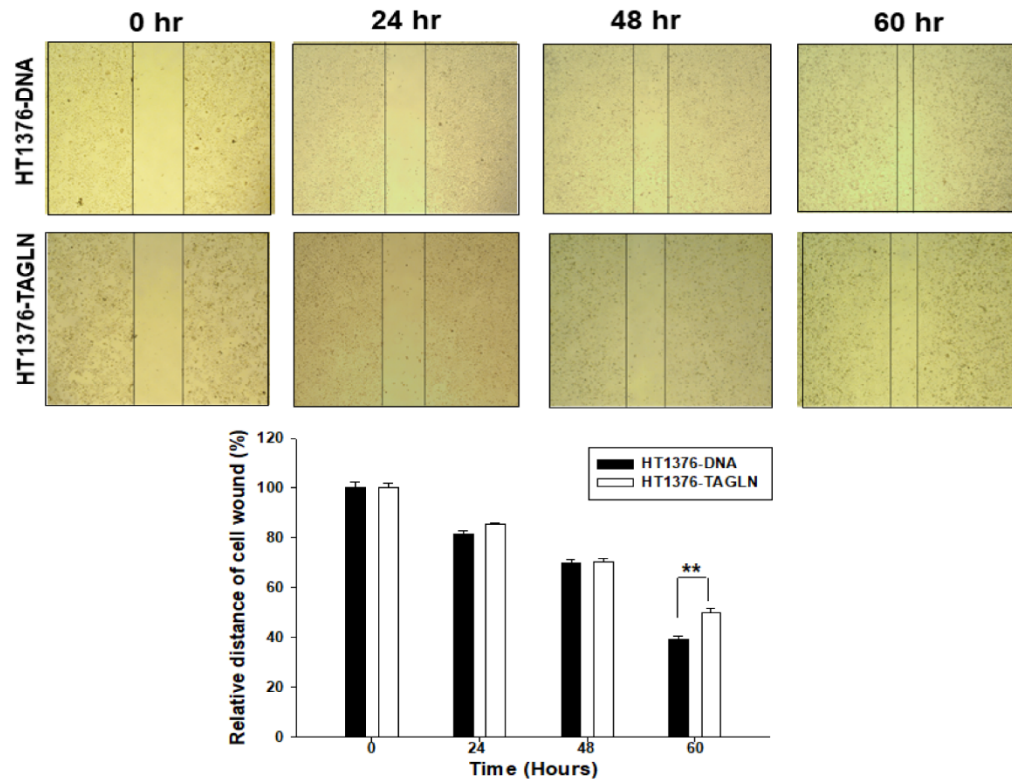

**Figure S2.** Effect of TAGLN on cell migration of bladder carcinoma HT1376 cells. The migration ability of HT-DNA and HT-TAGLN cells was determined by wound healing assays during the indicated times. \*\* is represented the  $p < 0.01$ .
